# Supplementary material
Source: HighWire-hosted journal article supplement (https://erj.ersjournals.com/content/58/1/2004497)

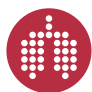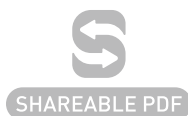

# The impact of asthma on mental health and wellbeing during COVID-19 lockdown

Daniel H. Higbee<sup>1,2</sup>, George W. Nava , Alex S.F. Kwong<sup>1,3</sup>, James W. Dodd <sup>1,2,4</sup> and Raquel Granell<sup>1,4</sup>

<sup>1</sup>MRC Integrative Epidemiology Unit (IEU), University of Bristol, Bristol, UK. <sup>2</sup>Academic Respiratory Unit, University of Bristol, Southmead Hospital, Bristol, UK. <sup>3</sup>Division of Psychiatry, Centre for Clinical Brain Sciences, University of Edinburgh, Edinburgh, UK. <sup>4</sup>Joint senior authors.

James W. Dodd ([james.dodd@bristol.ac.uk](mailto:james.dodd@bristol.ac.uk))

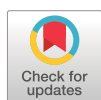

Shareable abstract (@ERSpublications)

**People with asthma are more vulnerable to the negative mental health impact of lockdown. This is not explained by mental or physical comorbidities and highlights the need to provide support for anxiety and depression in younger people with asthma.** <https://bit.ly/3tEbLYS>

**Cite this article as:** Higbee DH, Nava GW, Kwong ASF, *et al.* The impact of asthma on mental health and wellbeing during COVID-19 lockdown. *Eur Respir J* 2021; 58: 2004497 [DOI: 10.1183/13993003.04497-2020].

This single-page version can be shared freely online.

Copyright ©The authors 2021.

This version is distributed under the terms of the Creative Commons Attribution Non-Commercial Licence 4.0. For commercial reproduction rights and permissions contact [permissions@ersnet.org](mailto:permissions@ersnet.org)

Received: 25 Sept 2020  
Accepted: 17 March 2021

*To the Editor:*

It has been assumed that people with asthma would be at a high risk of developing severe illness from coronavirus disease 2019 (COVID-19), despite a lack of evidence [1]. Social isolation measures have aimed to mitigate this risk to vulnerable groups; however, such interventions can have negative mental health impacts [2].

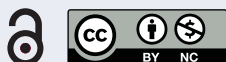

Supplement: inline-supplementary-material-1 [file inline-supplementary-material-1.pdf]
